# Supplementary material for: Arthrofibrosis after ACL reconstruction is best treated in a step-wise approach with early recognition and intervention: a systematic review
Source: Springer Nature journal article supplement (doi:10.1007/s00167-017-4482-1), 2017-03-04
Supplement: MOESM2 [file 12114534]

**Appendix 2 -** Outline of systematic search strategy used

**1993 Studies**

**Title Review**

**25 Studies Included**

**Abstract Review**

**Additional Studies Identified:** 1

**Hand Search of Conferences, Literature and Full Text References**

**Removal of duplicates**

**Removed: 805**

**Removed: 1408**

- **Animal/cadaver/in vitro:** 88
- **Review/opinion:** 78
- **Different joint/procedure:** 88
- **Non-operative:** 28
- **No outcome reported:** 5
- **Unrelated/other:** 1090
- **Duplicate:** 31

**585 Studies**

**Removed: 512**

- **Animal/cadaver/in vitro**: 5
- **Review/opinion:** 37
- **Different joint/procedure:** 4
- **Non-operative:** 1
- **No outcome reported:** 7
- **Unrelated/other:** 2
- **Duplicate:** 32
- **Not focused on arthrofibrosis:** 424

**73 Studies**

**Removed:** 49

- **Not available in English:** 22
- **Not reporting management strategy and/or outcome:** 27

**Full Text Review**

**24 Studies**

**2798 Studies Identified**

Medline: 511 Studies

Embase: 1601 Studies

PubMed: 686 Studies
